# Supplementary material
Source: PubMed Central journal article supplement (PMC6459285)
Supplement: dey005suppl_table1.pdf [file dey005suppl_table1.pdf]

**Supplementary Table S1** Selected characteristics of the 34 832 women from the Nurses' Health Study II (NHSII) included in the analysis overall and the 77 884 women exclude from the analyses.

| Characteristic<br>N                                                | Included<br>34 832 | Excluded<br>77 884 |
|--------------------------------------------------------------------|--------------------|--------------------|
| Age in 1989 (years), Mean $\pm$ SD                                 | 34.8 $\pm$ 4.6     | 34.8 $\pm$ 4.7     |
| Race, N (%)                                                        |                    |                    |
| White                                                              | 33 982 (97.6)      | 73 502 (94.4)      |
| Other races                                                        | 850 (2.4)          | 4382 (5.6)         |
| High school Alternative Healthy Eating Index, Mean $\pm$ SD        | 46.2 $\pm$ 9.8     | 46.4 $\pm$ 9.9     |
| High school physical activity (hours/week), Mean $\pm$ SD          |                    |                    |
| Strenuous                                                          | 3.7 $\pm$ 2.8      | 3.7 $\pm$ 2.4      |
| Moderate                                                           | 3.3 $\pm$ 2.3      | 3.5 $\pm$ 2.0      |
| Walking                                                            | 2.1 $\pm$ 1.9      | 1.8 $\pm$ 1.7      |
| Body mass index (BMI, kg/m <sup>2</sup> ) at age 18, Mean $\pm$ SD | 21.3 $\pm$ 3.2     | 21.3 $\pm$ 3.4     |
| Age at menarche, N (%)                                             |                    |                    |
| <12                                                                | 8340 (23.9)        | 19 345 (24.8)      |
| 12                                                                 | 10 715 (30.8)      | 23 119 (29.7)      |
| 13                                                                 | 9648 (27.7)        | 21 113 (27.1)      |
| $\geq$ 14                                                          | 6025 (17.3)        | 14 047 (18.0)      |
| Missing or not known                                               | 104 (0.3)          | 260 (0.3)          |
| Cigarettes per day during high school, N (%)                       |                    |                    |
| 0                                                                  | 33 136 (95.1)      | 73 949 (95.0)      |
| 1–4                                                                | 1096 (3.2)         | 3935 (5.0%)        |
| Region of residence in high school                                 |                    |                    |
| Northeast                                                          | 13 243 (38.0)      | 21 384 (27.5)      |
| Midwest                                                            | 12 845 (36.9)      | 20 975 (26.9)      |
| West                                                               | 4139 (11.9)        | 8845 (11.4)        |
| South                                                              | 4343 (12.5)        | 5775 (7.4)         |
| Outside US/Missing                                                 | 262 (0.8)          | 20 905 (26.8)      |
| Menstrual irregularity phenotypes, N (%)                           |                    |                    |
| Moderate irregularity                                              | 4882 (14.0)        | 10 783 (13.9)      |
| Persistent irregularity                                            | 3074 (8.8)         | 6647 (8.5)         |
| Moderate irregularity with androgen excess                         | 714 (2.1)          | 1490 (1.9)         |
| Number of years until menstrual regularity, N (%)                  |                    |                    |
| <1                                                                 | 15 933 (45.7)      | 35 853 (46.0)      |
| 1–2                                                                | 8597 (24.7)        | 19 160 (24.6)      |
| 3–4                                                                | 2397 (6.9)         | 5339 (6.9)         |
| 5+                                                                 | 4069 (11.7)        | 8789 (11.3)        |
| Never                                                              | 3660 (10.5)        | 8307 (10.7)        |
| Missing                                                            | 176 (0.5)          | 436 (0.6)          |

Note: Moderate irregularity is defined as always irregular in high school or ages 18–22, persistent irregularity is defined as always irregular in high school and ages 18–22, and moderate irregularity with androgen excess is defined as always irregular in high school or ages 18–22 and severe teenage acne or hirsutism before 1989.
