# Supplementary material
Source: PubMed Central journal article supplement (PMC6459285)
Supplement: dey005suppl_table2.pdf [file dey005suppl_table2.pdf]

**Supplementary Table SII** Distributions of total suspended particulate (TSP,  $\mu\text{g}/\text{m}^3$ ) levels among 34 832 women in the Nurses' Health Study II (NHSII).

| <b>TSP averaging window</b> | <b>Mean <math>\pm</math> SD</b> | <b>Median</b> | <b>25th percentile</b> | <b>75th Percentile</b> | <b>Minimum</b> | <b>Maximum</b> |
|-----------------------------|---------------------------------|---------------|------------------------|------------------------|----------------|----------------|
| High school                 | 90.1 $\pm$ 32.6                 | 84.3          | 65.5                   | 110.0                  | 10.1           | 319.7          |
| Age 14                      | 94.4 $\pm$ 39.1                 | 88.5          | 65.5                   | 117.4                  | 7.2            | 652.0          |
| Age 15                      | 90.6 $\pm$ 38.5                 | 83.1          | 62.9                   | 111.4                  | 8.8            | 806.3          |
| Age 16                      | 88.3 $\pm$ 37.4                 | 80.6          | 61.4                   | 107.0                  | 6.3            | 453.2          |
| Age 17                      | 85.6 $\pm$ 36.6                 | 77.4          | 59.8                   | 103.1                  | 6.3            | 910.4          |
| Age 18                      | 84.1 $\pm$ 35.2                 | 75.7          | 59.1                   | 101.1                  | 7.2            | 427.3          |
