# Supplementary material
Source: PubMed Central journal article supplement (PMC6459285)
Supplement: dey005suppl_table4.pdf [file dey005suppl_table4.pdf]

**Supplementary Table SIV** Multivariable adjusted<sup>a</sup> odds ratios (95%CI) for an interquartile range increase in high school total suspended particulate exposure (45 µg/m<sup>3</sup>) on several menstrual irregularity phenotypes among 34 832 women in the Nurses' Health Study II (NHSII), stratified by age in 1989, age at menarche, or region of residence during high school.

| Effect modifier         | Moderate irregularity<br>OR (95%CI) | Persistent irregularity<br>OR (95%CI) | Moderate irregularity with androgen excess<br>OR (95%CI) |
|-------------------------|-------------------------------------|---------------------------------------|----------------------------------------------------------|
| Age (years) in 1989     |                                     |                                       |                                                          |
| 24.75–31.32             | 1.08 (0.95, 1.21)                   | 1.09 (0.94, 1.27)                     | 1.13 (0.85, 1.51)                                        |
| 31.33–34.99             | 1.09 (0.98, 1.21)                   | 1.05 (0.92, 1.20)                     | 1.13 (0.87, 1.46)                                        |
| 35.00–38.49             | 1.09 (1.00, 1.20)                   | 1.08 (0.96, 1.21)                     | 1.23 (0.99, 1.52)                                        |
| 38.50–44.25             | 1.06 (0.97, 1.16)                   | 1.08 (0.98, 1.20)                     | 0.96 (0.77, 1.21)                                        |
| P-value for interaction | 0.53                                | 0.21                                  | 0.26                                                     |
| Age at menarche         |                                     |                                       |                                                          |
| <12                     | 1.05 (0.93, 1.17)                   | 1.00 (0.87, 1.14)                     | 1.16 (0.90, 1.48)                                        |
| 12                      | 1.08 (0.98, 1.19)                   | 1.07 (0.95, 1.20)                     | 1.22 (0.97, 1.53)                                        |
| 13                      | 1.11 (1.01, 1.22)                   | 1.09 (0.97, 1.22)                     | 1.05 (0.82, 1.36)                                        |
| ≥14                     | 1.10 (1.00, 1.21)                   | 1.15 (1.02, 1.29)                     | 0.99 (0.77, 1.27)                                        |
| P-value for interaction | 0.71                                | 0.40                                  | 0.44                                                     |
| Region of residence     |                                     |                                       |                                                          |
| Northeast               | 1.10 (1.03, 1.19)                   | 1.09 (1.00, 1.19)                     | 1.14 (0.94, 1.36)                                        |
| Midwest                 | 1.06 (0.96, 1.17)                   | 1.08 (0.96, 1.22)                     | 0.95 (0.74, 1.22)                                        |
| West                    | 1.08 (0.94, 1.25)                   | 1.03 (0.86, 1.23)                     | 1.05 (0.76, 1.45)                                        |
| South                   | 1.09 (0.94, 1.26)                   | 1.09 (0.91, 1.30)                     | 1.24 (0.88, 1.73)                                        |
| P-value for interaction | 0.84                                | 0.53                                  | 0.18                                                     |

<sup>a</sup>Multivariable models adjusted for age, race, BMI at age 18, smoking during high school and physical activity during high school.
