# Supplementary material
Source: PubMed Central journal article supplement (PMC6459285)
Supplement: dey005suppl_table5.pdf [file dey005suppl_table5.pdf]

**Supplementary Table SV** Multivariable<sup>a</sup> adjusted associations between participant high school total suspended particulate exposure (scaled to the interquartile range of a 45  $\mu\text{g}/\text{m}^3$ ) on time to menstrual regularity among 34 656 women in the Nurses' Health Study II (NHSII), stratified by age in 1989, age at menarche, or region of residence during high school.

|                         | Multinomial regression,<br>OR (95%CI) |
|-------------------------|---------------------------------------|
| Age (years) in 1989     |                                       |
| 24.75–31.32             | 1.03 (0.95, 1.11)                     |
| 31.33–34.99             | 1.00 (0.93, 1.07)                     |
| 35.00–38.49             | 1.08 (1.02, 1.15)                     |
| 38.50–44.25             | 1.04 (0.98, 1.10)                     |
| P-value for interaction | 0.83                                  |
| Age at menarche         |                                       |
| <12                     | 1.00 (0.93, 1.07)                     |
| 12                      | 1.04 (0.98, 1.10)                     |
| 13                      | 1.06 (1.00, 1.13)                     |
| ≥14                     | 1.06 (0.98, 1.14)                     |
| P-value for interaction | <0.0001                               |
| Region of residence     |                                       |
| Northeast               | 1.04 (1.00, 1.10)                     |
| Midwest                 | 1.01 (0.95, 1.08)                     |
| West                    | 1.06 (0.97, 1.15)                     |
| South                   | 1.00 (0.91, 1.11)                     |
| P-value for interaction | 0.006                                 |

<sup>a</sup>Multivariable models adjusted for age, race, BMI at age 18, smoking during high school and physical activity during high school.
